# Supplementary material for: Cancer/testis antigen PIWIL2 suppresses circadian rhythms by regulating the stability and activity of BMAL1 and CLOCK
Source: PubMed Central journal article supplement (PMC5589630; doi:10.18632/oncotarget.18973), 2017-07-04
Supplement: oncotarget-08-54913-s001.pdf [file oncotarget-08-54913-s001.pdf]

## Cancer/testis antigen PIWIL2 suppresses circadian rhythms by regulating the stability and activity of BMAL1 and CLOCK

### SUPPLEMENTARY MATERIALS

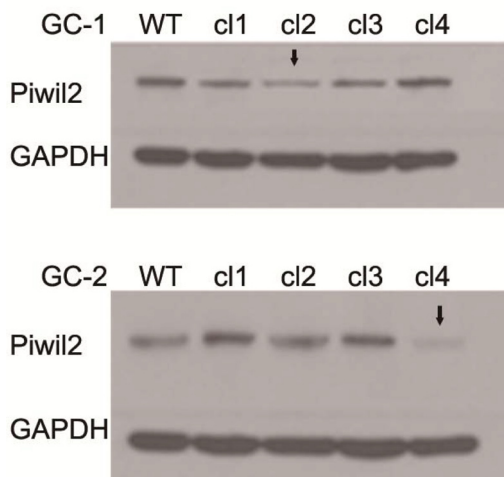

**Supplementary Figure 1: Establishment of Piwil2 knocked-down stable cell lines.** GC-1 and GC-2 cells were transfected with shPiwil2 plasmids and then selected with Hygromycin B (0.250 mg/ml for GC-1 and 0.350 mg/ml for GC-2, respectively). Hygromycin B resistant clones were appraised with western blotting analysis with anti-Piwil2 antibody. Black arrows indicate clones that expressed the lowest level of Piwil2 and were chosen for followed experiments.

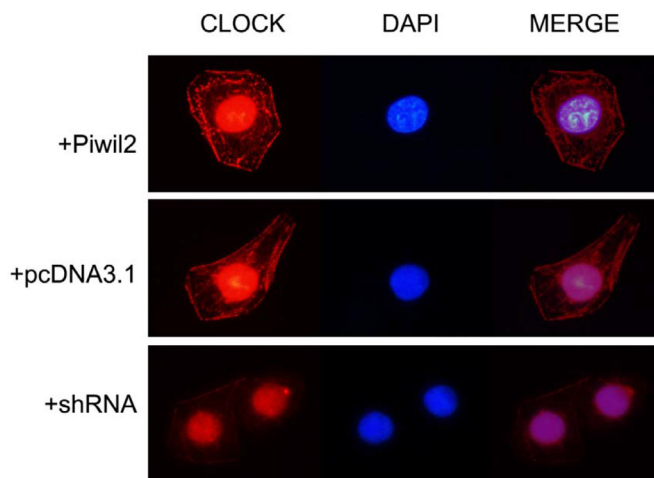

**Supplementary Figure 2: Knockdown of PIWIL2 down-regulates CLOCK expression mostly in the cytoplasm.**

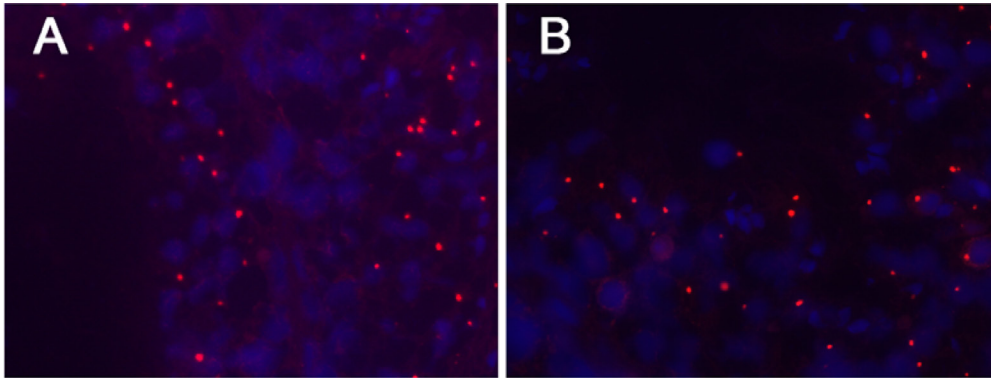

**Supplementary Figure 3:** Fluorescent immunohistochemistry (IHC) showed expression of MVH in mouse testis injected with *Piwil2*-specific shRNA vectors (A) or empty vectors (B).
